# Supplementary material for: Decoding the endometrial niche of Asherman’s Syndrome at single-cell resolution
Source: PubMed Central journal article supplement (PMC10514053; doi:10.1038/s41467-023-41656-1), 2023-09-21
Supplement: 41467_2023_41656_MOESM1_ESM.pdf [file 41467_2023_41656_MOESM1_ESM.pdf]

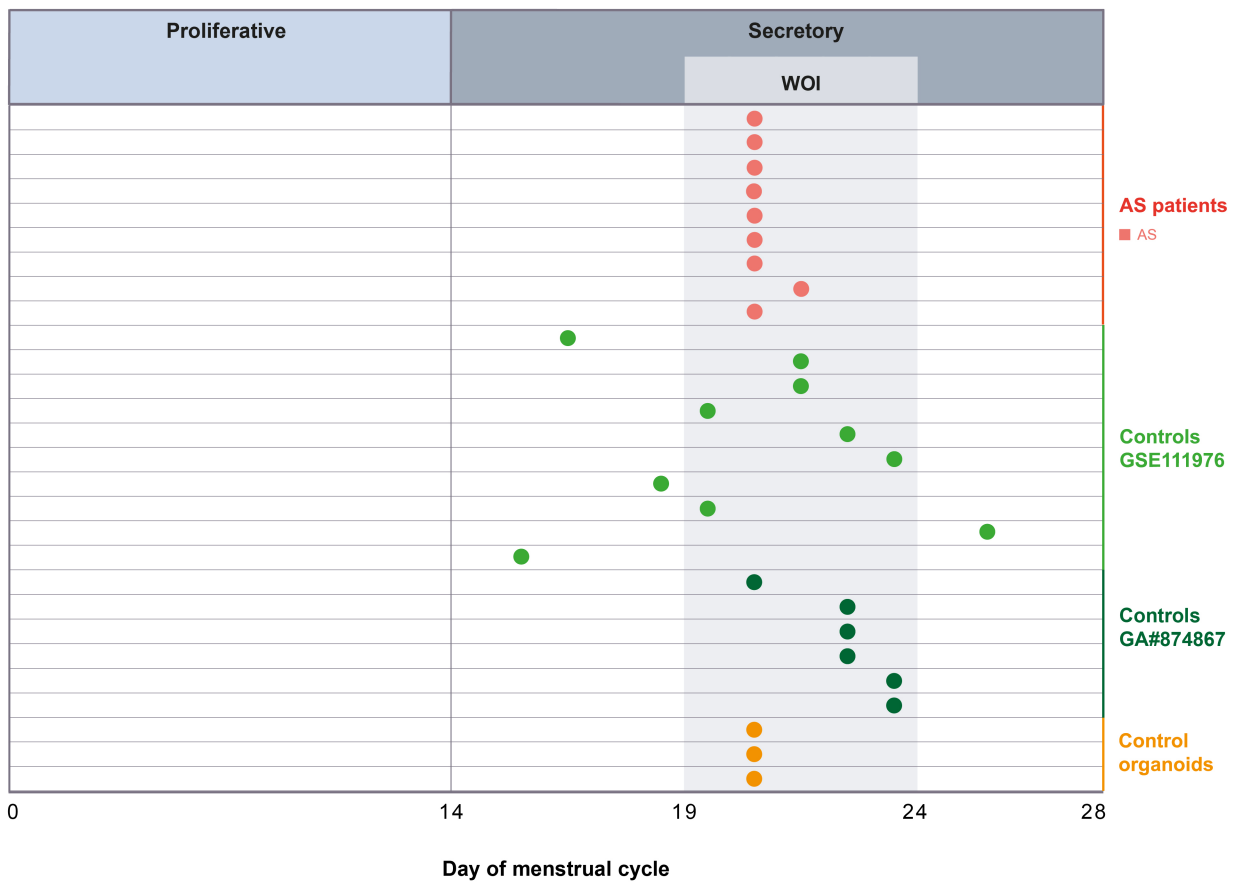

**Supplementary Figure 1.** Diagram representing the days of the menstrual cycle and endometrial phase of all individuals (patients and controls) analyzed using single-cell transcriptomics. Colored dots represent each patient included in the different datasets in the study. Abbreviation: AS: Asherman's syndrome; WOI: window of implantation.

**A**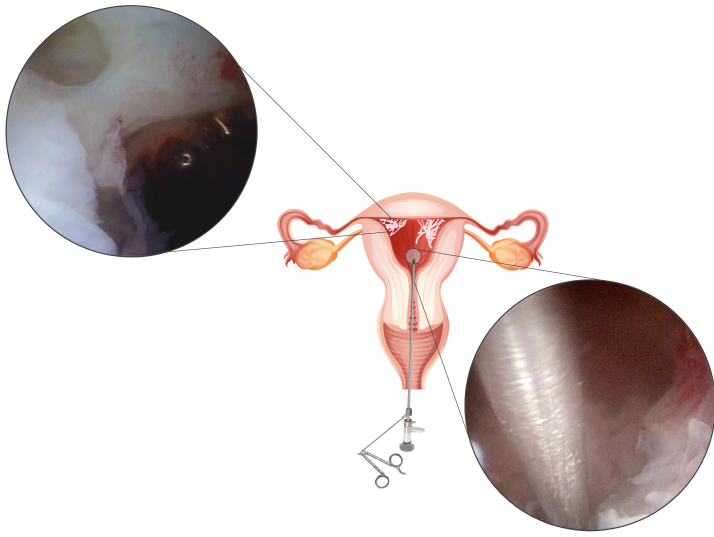**B**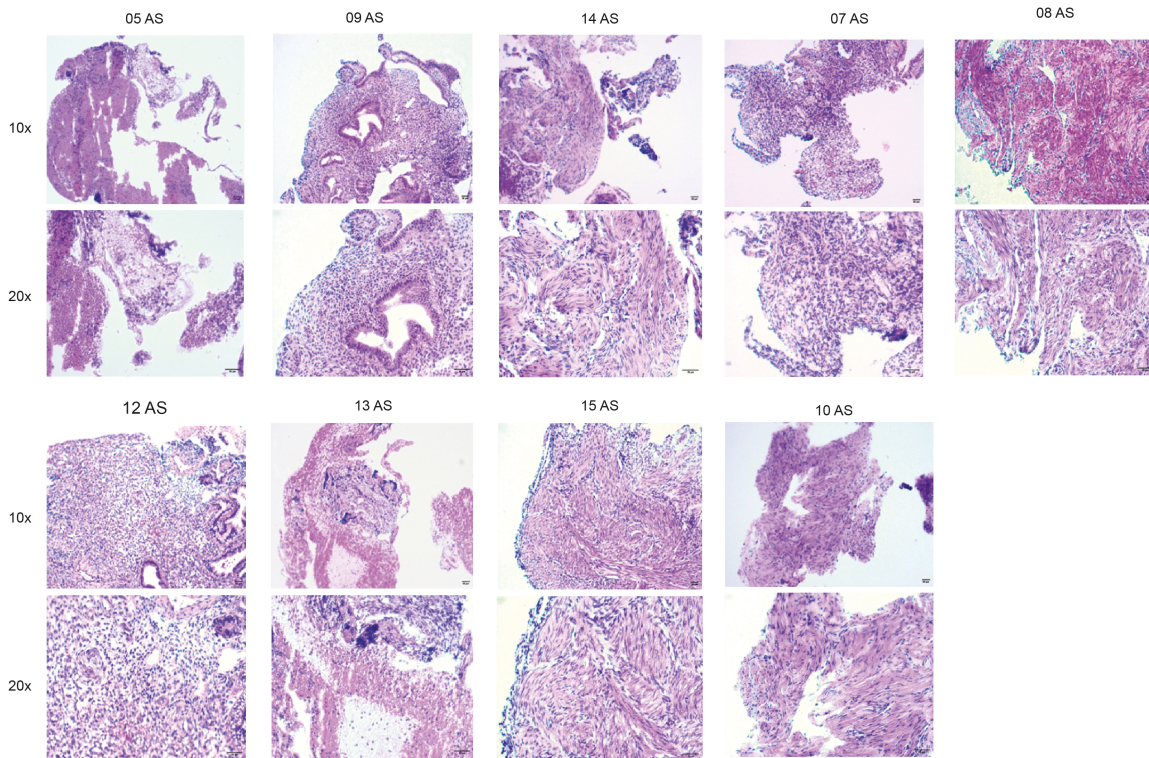**C**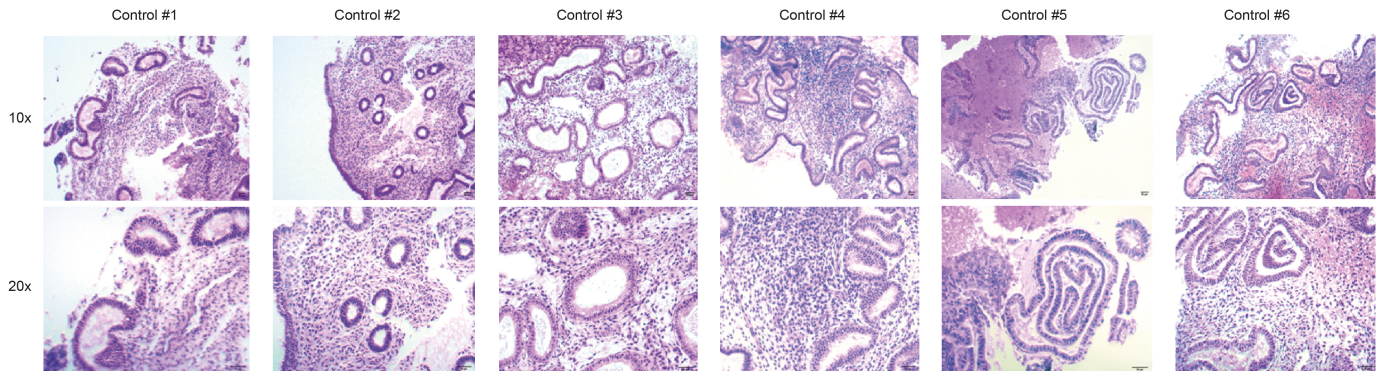

**Supplementary Figure 2. A)** Schematic diagram of the sample collection procedure. Once the endometrial cavity was assessed by hysteroscopy, endometrial biopsy was obtained with hysteroscopic graspers from the posterior wall of the uterine cavity  $\geq 1$  cm apart from any intrauterine adhesion. **B)** H&E staining of AS patients (AS) at 10X and 20X magnification (n=9 for independent AS samples before (AS) and after (AS-Post)). **C)** H&E staining of control samples (GA#874867 set) at 10X and 20X magnification. Scale bar = 50  $\mu$ m for both magnifications. Abbreviation: AS: Asherman's syndrome (n=6 for independent control samples).



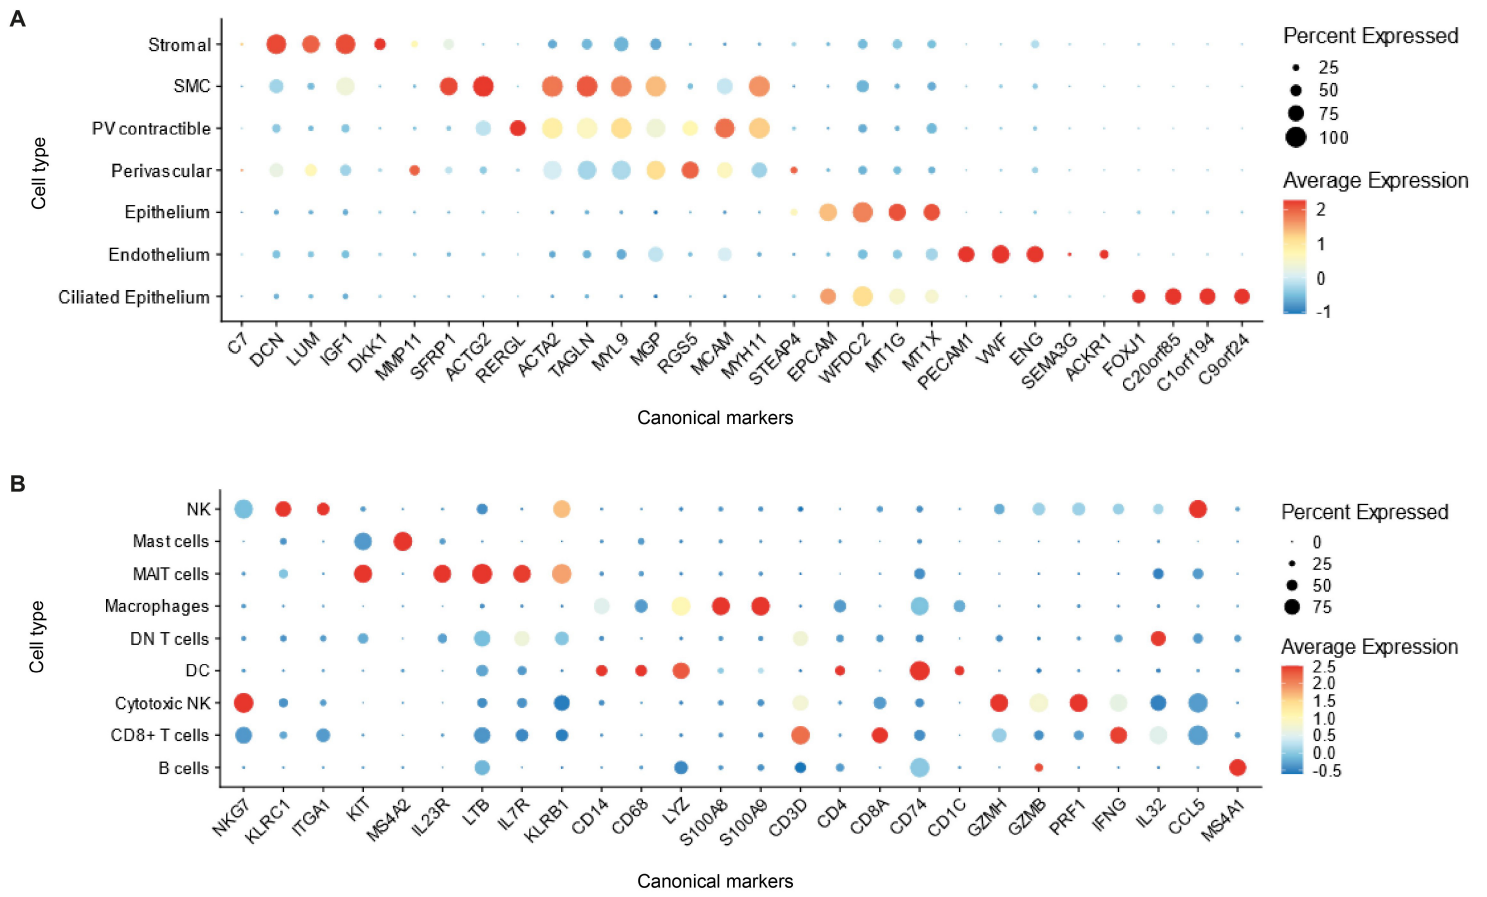

**Supplementary Figure 3. Dot plot of canonical marker gene expression in defined A) main populations and B) immune populations of the AS cartography (Supplementary Table 2 contains a complete list of reference canonical markers used to evaluate cell identities). Abbreviations: DC: dendritic cells; DN: double negative; MAIT: mucosal-associated invariant T; NK: natural killer; PV: perivascular; SMC: smooth muscle cells.**

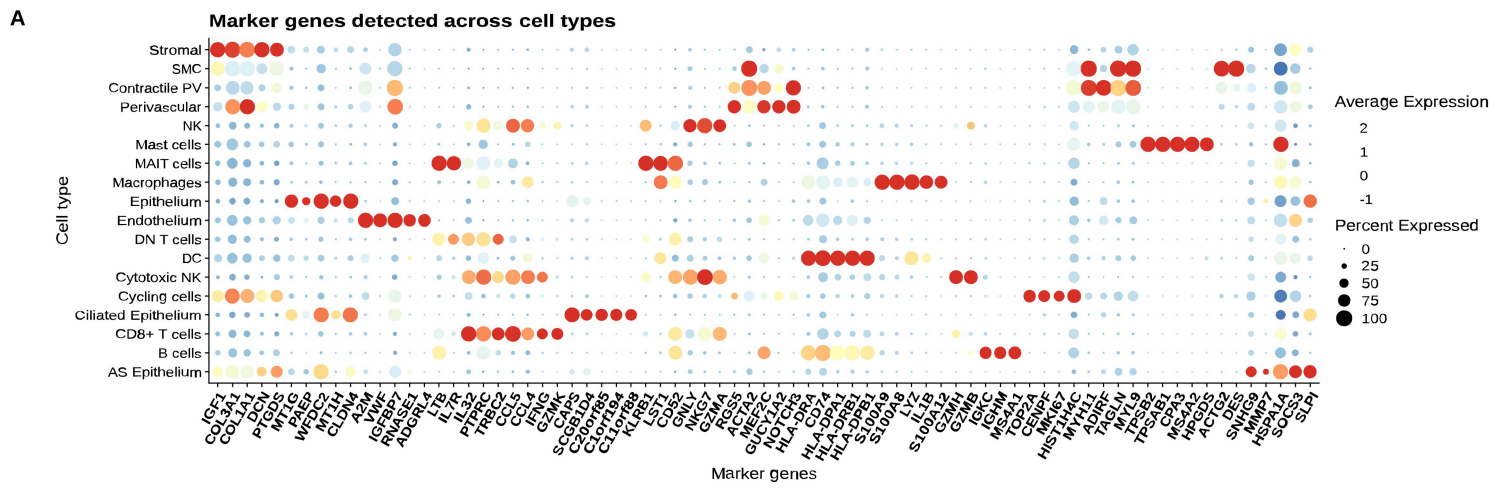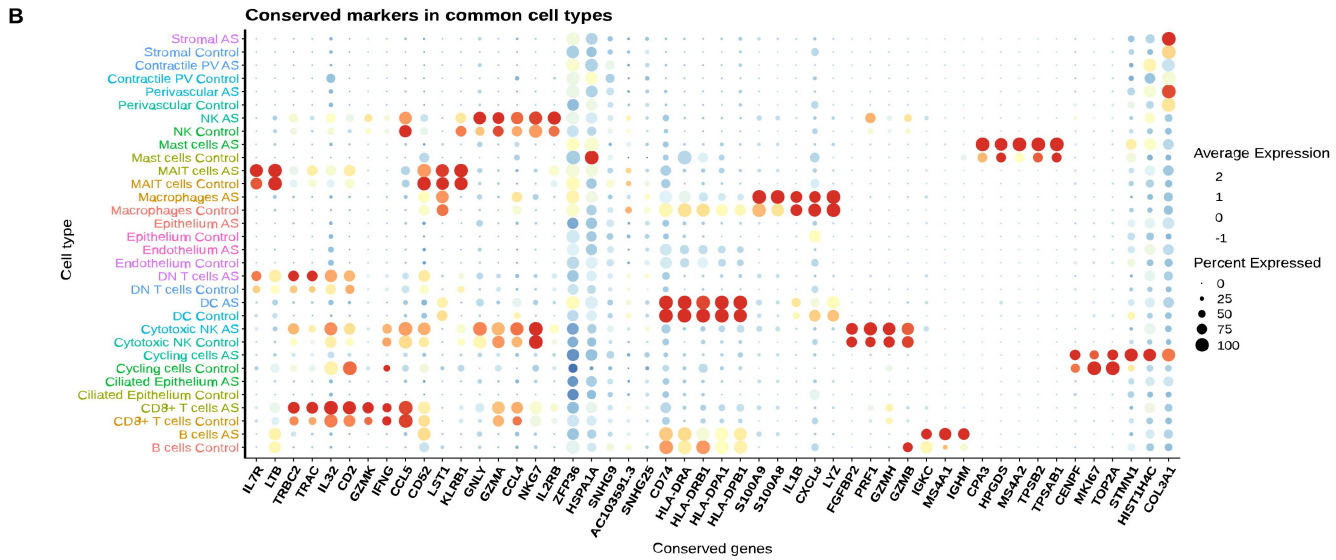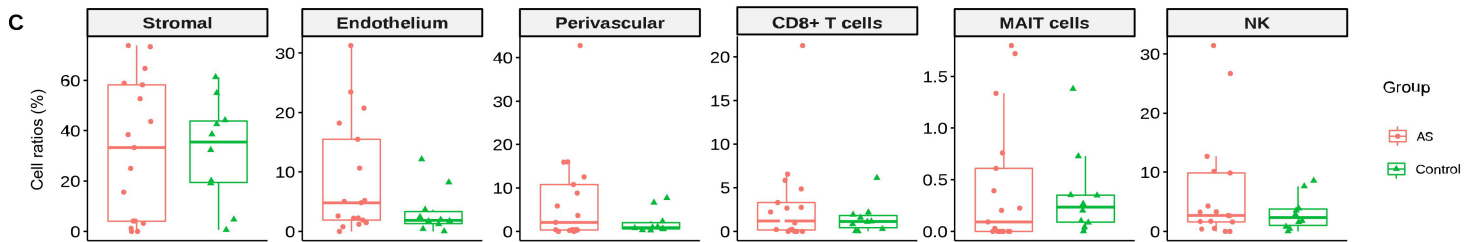

**Supplementary Figure 4.** **A)** Dot plot showing the top five differentially-expressed genes in annotated main cell types in the AS cartography. Supplementary Table 3 contains a complete description of differentially-expressed genes. **B)** Dot plot showing the expression of the top five conserved genes between cell types from AS and control endometria (**Supplementary Table 4** contains a complete description of conserved genes). **C)** Differences in cell ratios comparing AS and control endometria (n=9 for independent AS patients, n=10 for independent healthy endometrium patients). Abbreviations: AS: Asherman; DC: dendritic cells; DN: double negative; MAIT: mucosal-associated invariant T; NK: natural killer; PV: perivascular; SMC: smooth muscle cells; UMAP: Uniform manifold approximation and projection.

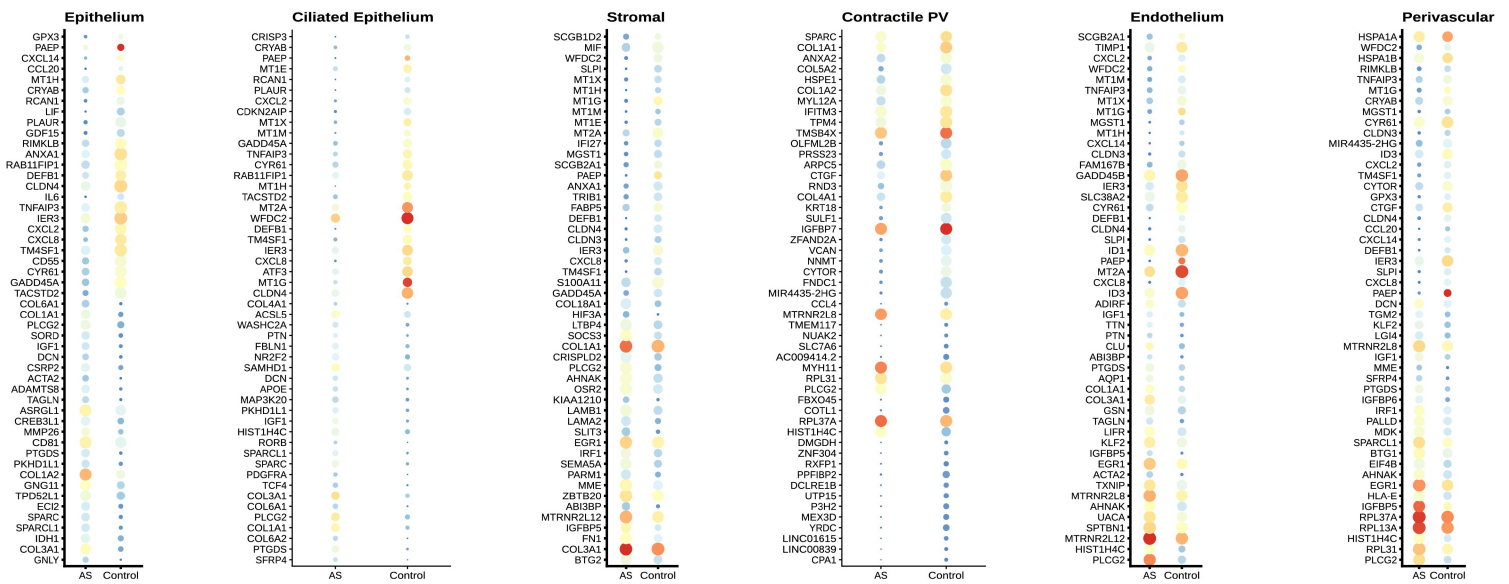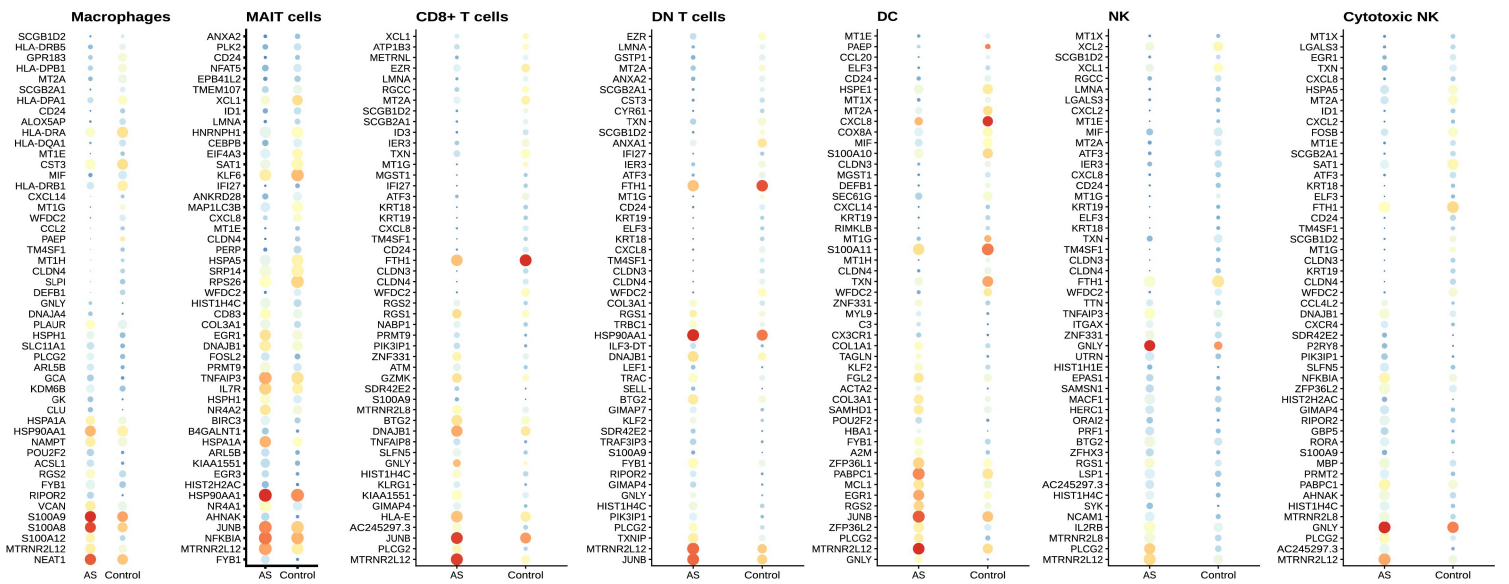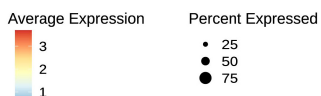

**Supplementary Figure 5.** Differential gene expression between AS and control endometria separated by cell type (two-sided Wilcoxon Rank Sum test, FDR < 0.05). Abbreviations: AS: Asherman's syndrome; DC: dendritic cells; DN: double negative; NK: natural killer; PV: perivascular.





**A**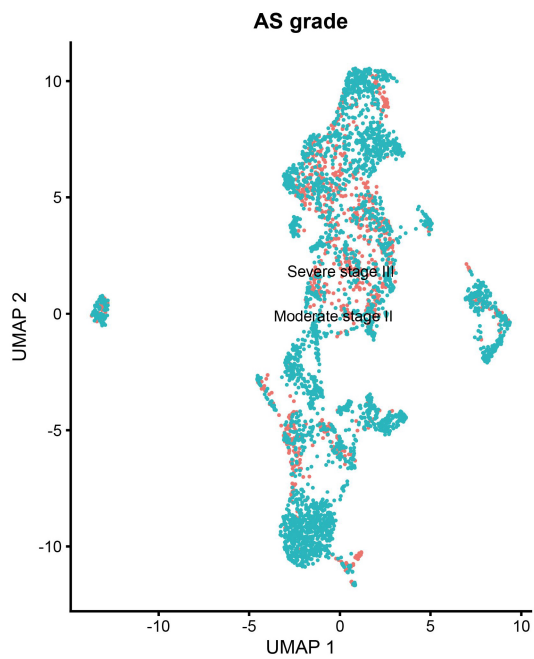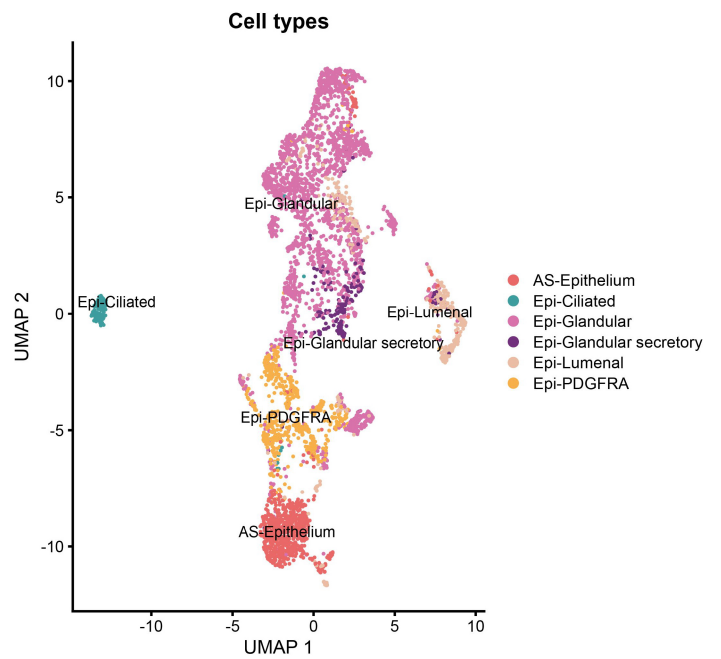**B**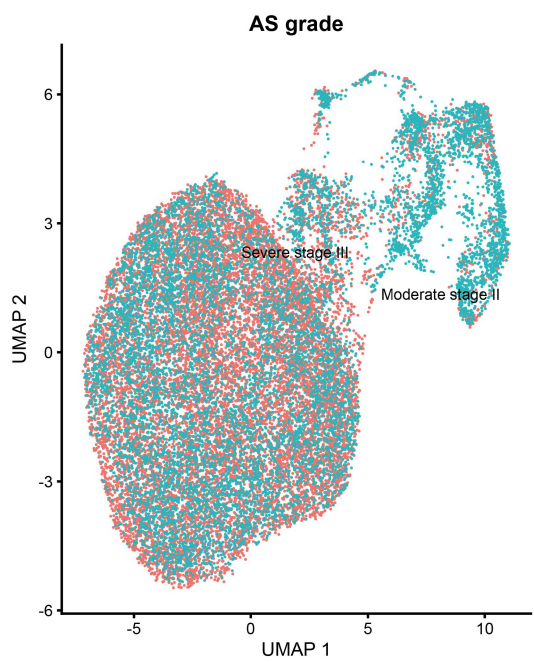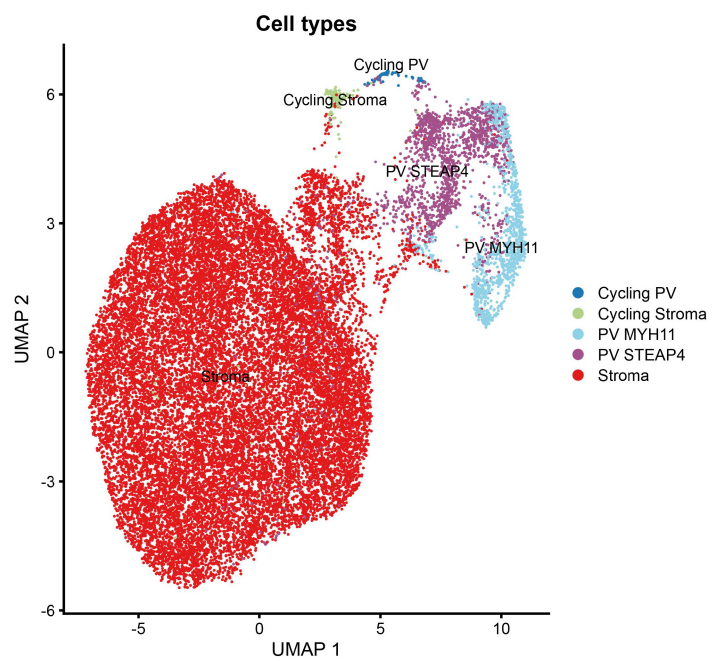

**Supplementary Figure 7. scRNA-seq analysis of Asherman's syndrome endometria classified by severity. A) UMAP of detected epithelial subpopulations. B) UMAP of detected stromal subpopulations. Abbreviations: AS: Asherman; Epi: epithelium; PV: perivascular; UMAP: uniform manifold approximation and projection.**

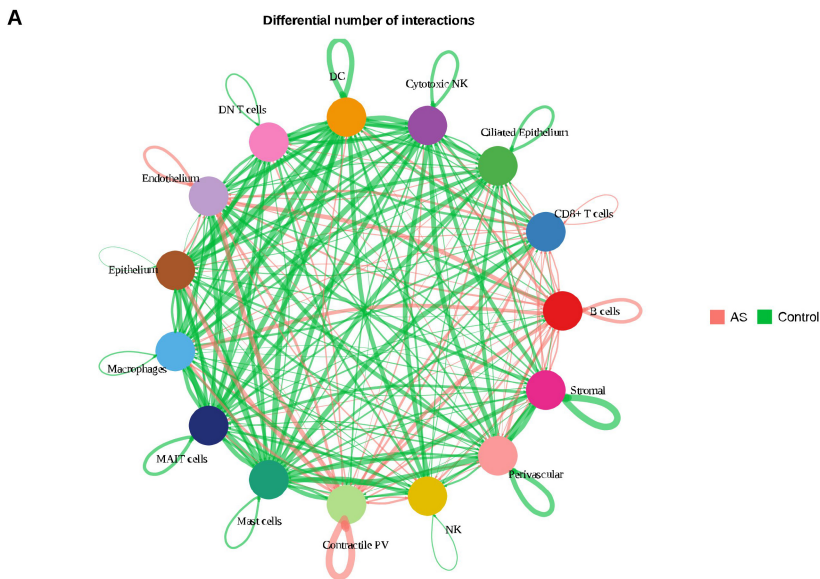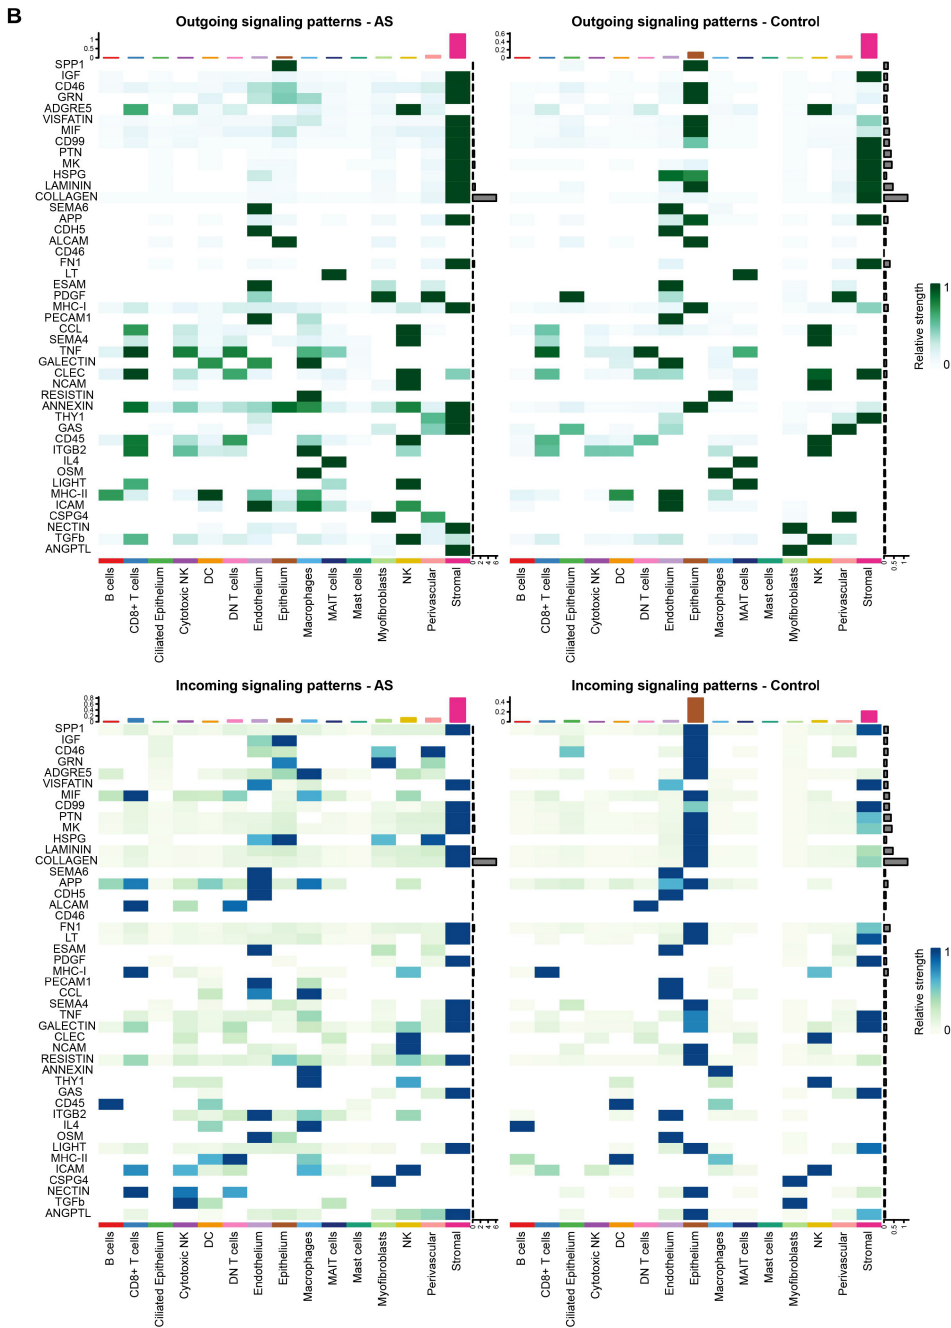

**Supplementary Figure 8. A)** CCC communication network showing significant ligand-receptor interactions in AS and Control endometria samples. **B)** Heatmap of signaling patterns (outgoing: upper panel, incoming: lower panel) between cell types in AS and Control endometria. Abbreviations: AS: Asherman; DC: dendritic cells; DN: double negative; MALT: mucosal-associated invariant T; NK: natural killer; PV: perivascular; SMC: smooth muscle cells.



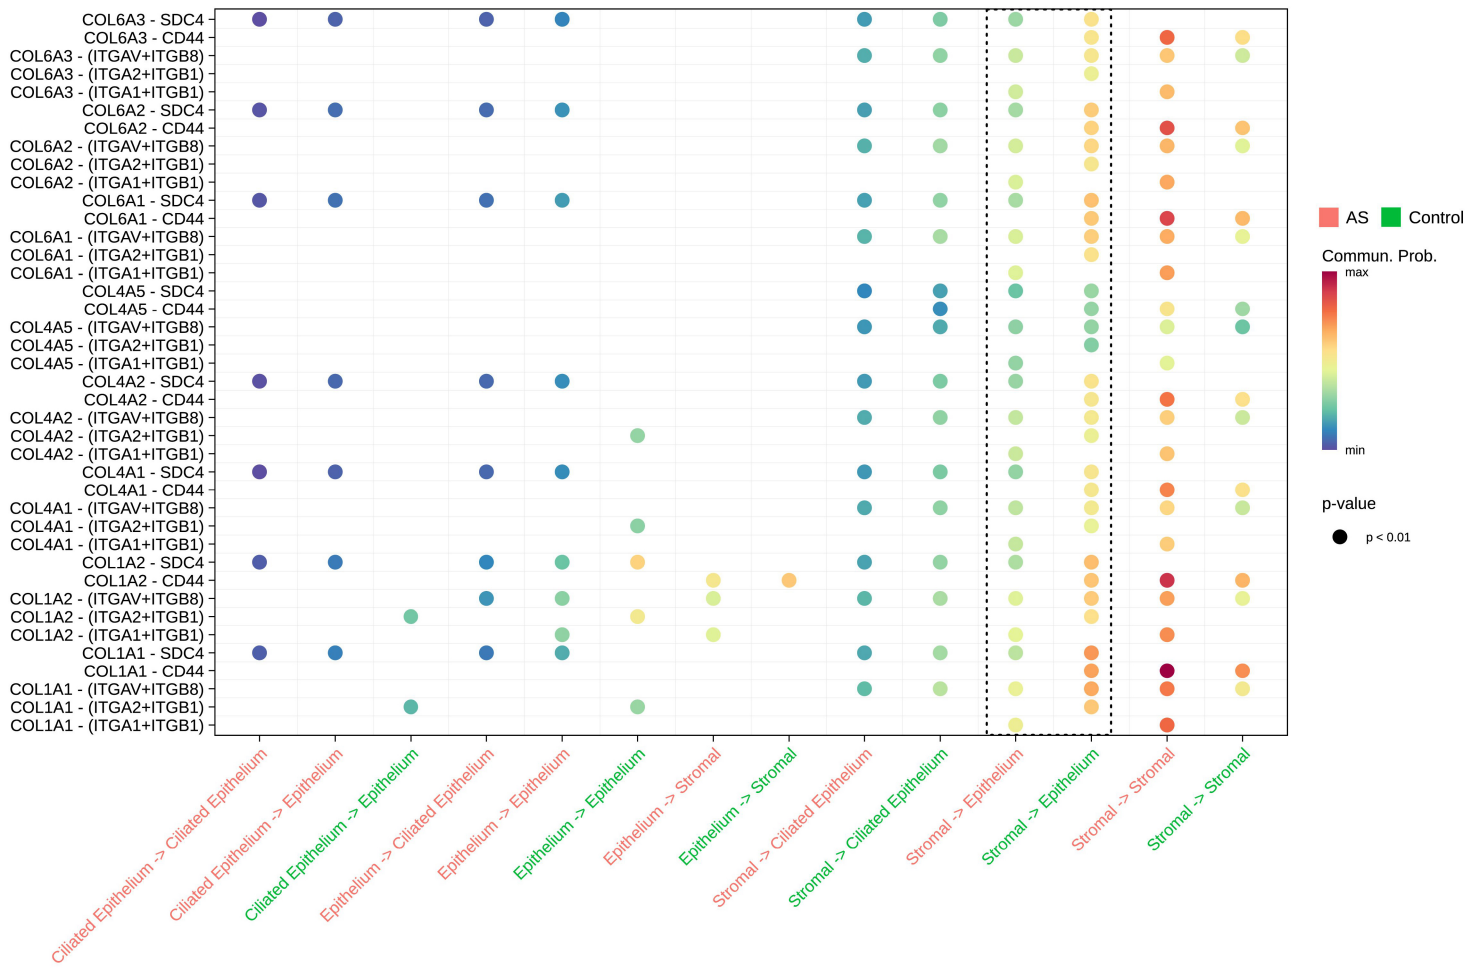

**Supplementary Figure 9.** Dot plot of CCC communication results for the COLLAGEN signaling pathway (two-sided Wilcoxon test). (AS in red labels, Control in green labels). Abbreviations: AS: Asherman.



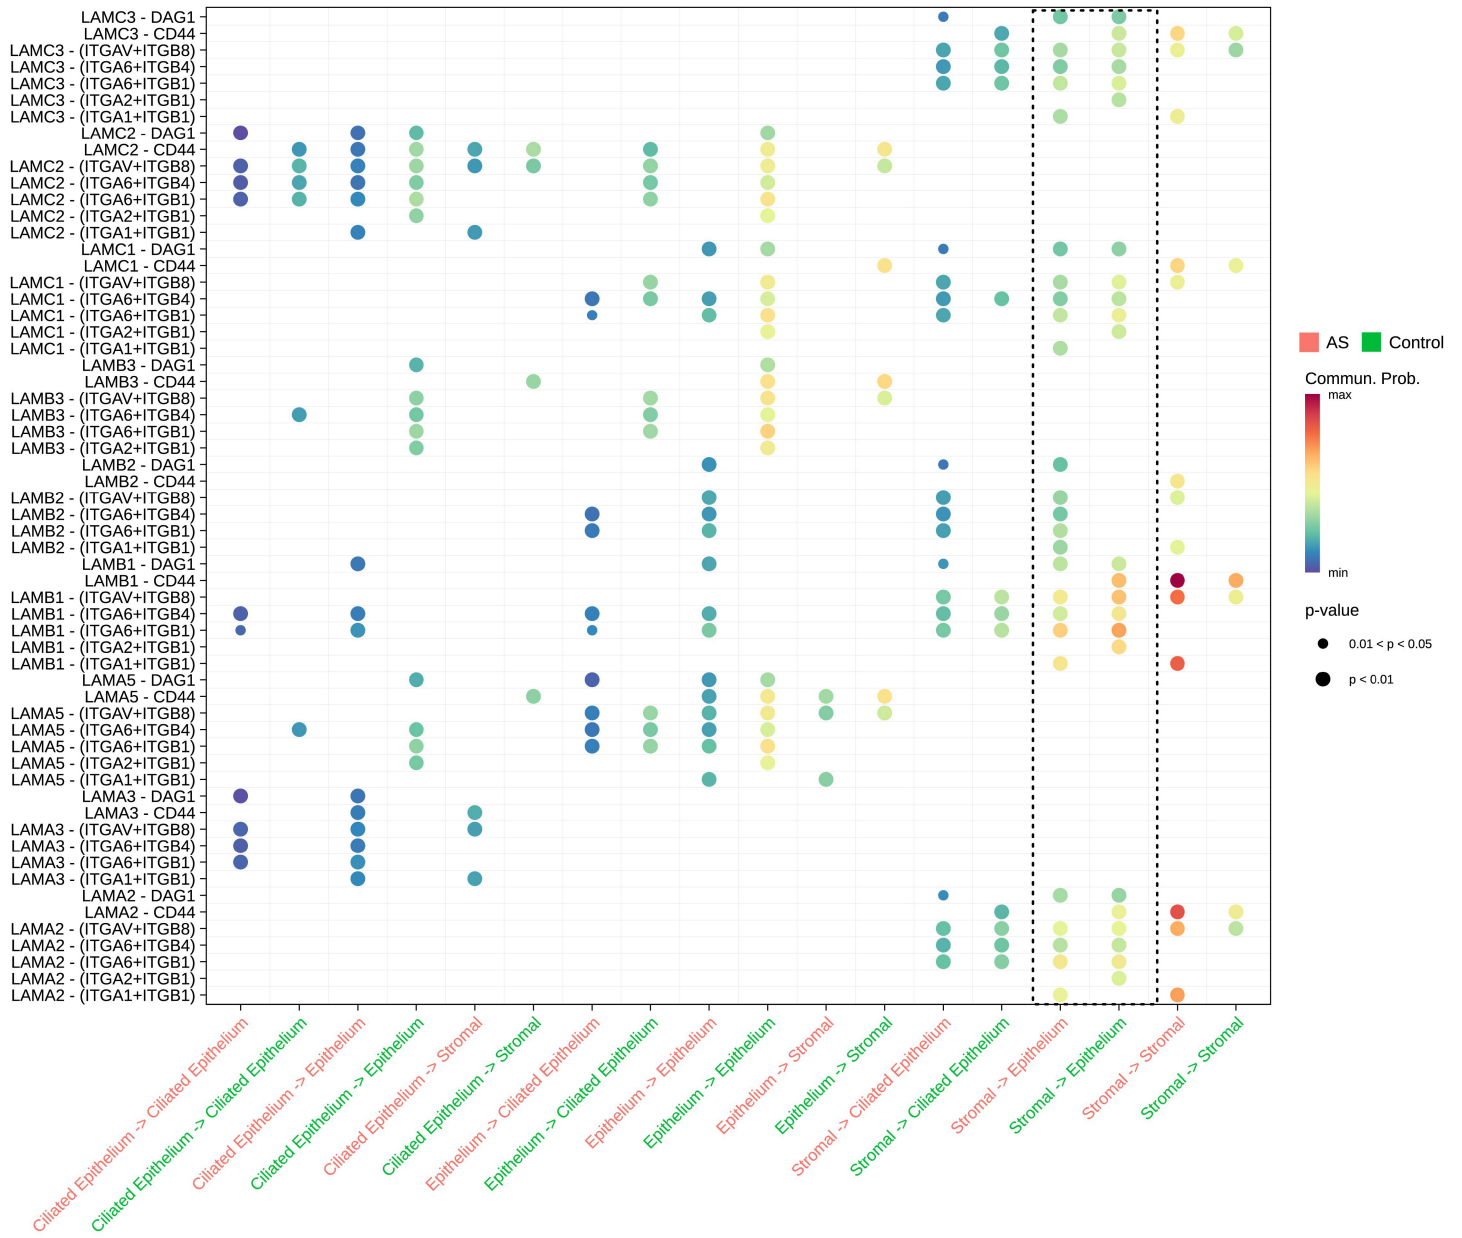

**Supplementary Figure 11.** Dot plot of CCC results for the LAMININ signaling pathway (two-sided Wilcoxon test). (AS in red labels, Control in green labels). Abbreviations: AS: Asherman.





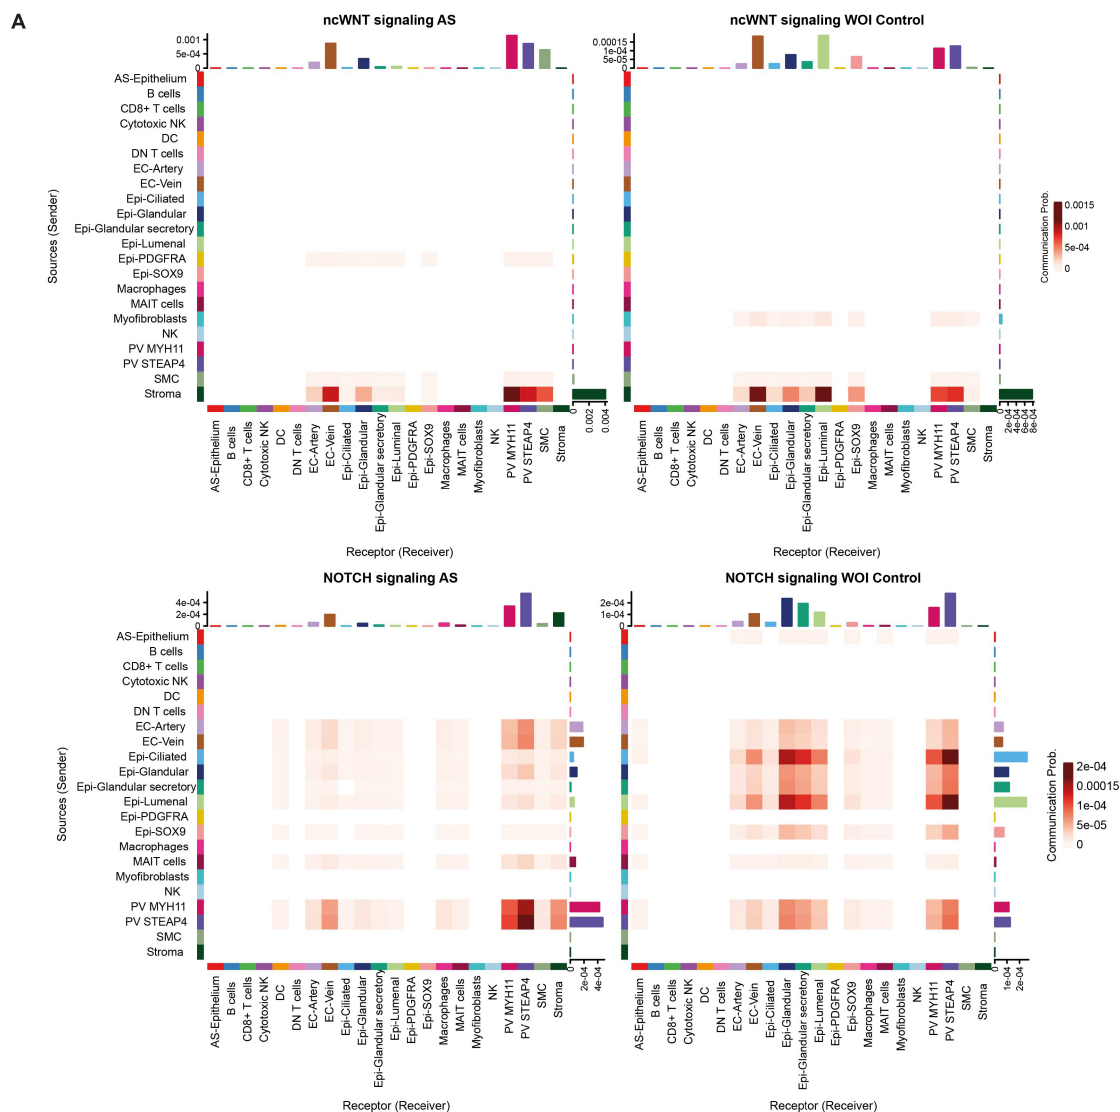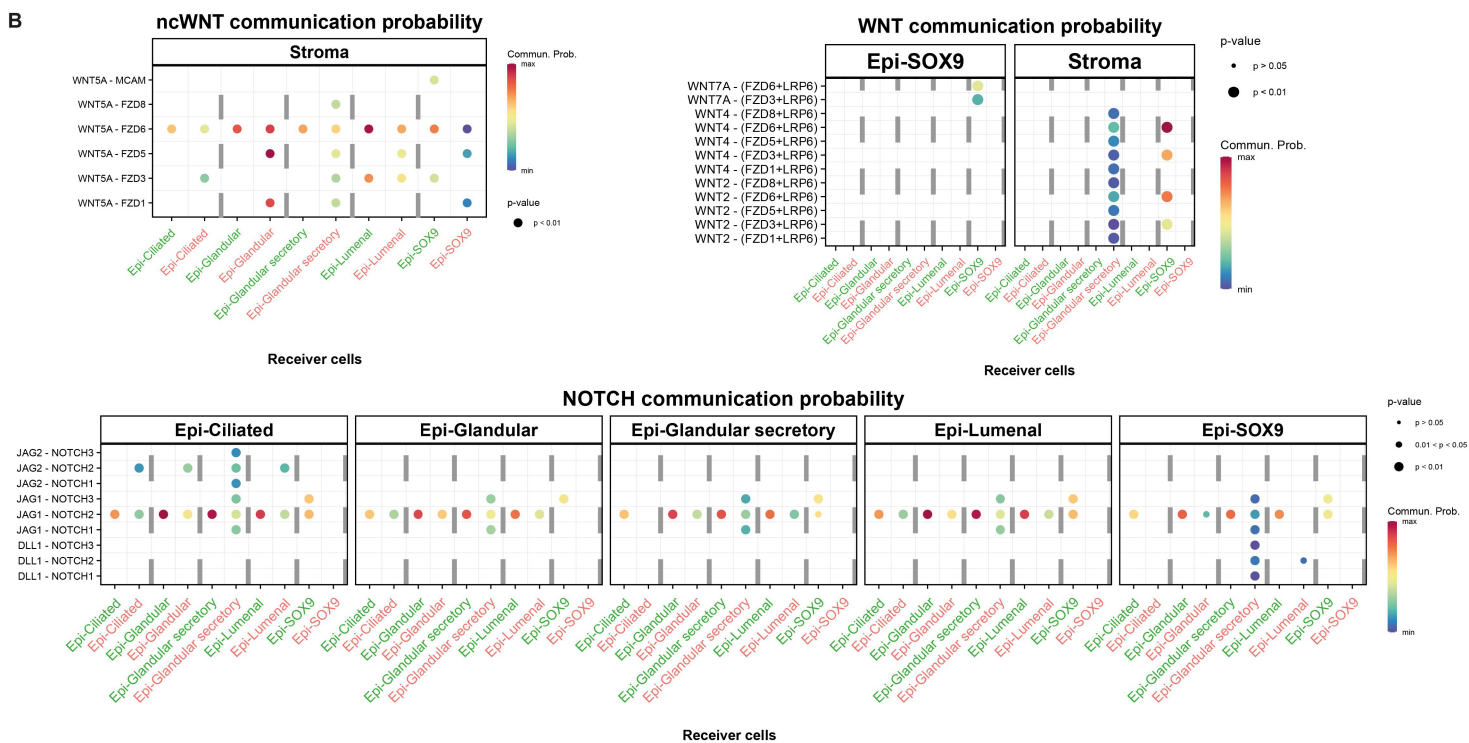

**Supplementary Figure 13. CCC probabilities in pathways related to epithelial fraction differentiation. A)** Heatmap displaying CCC probabilities of ncWNT and NOTCH pathways. **B)** Heatmap displaying CCC probabilities of ncWNT, WNT, and NOTCH pathways (two-sided Wilcoxon test). Abbreviations: AS: Asherman's syndrome; DC: dendritic cells; DN: double negative; EC: endothelial cell; Epi: epithelium; MAIT: mucosal-associated invariant T; NK: natural killer; PV: perivascular; SMC: smooth muscle cells.

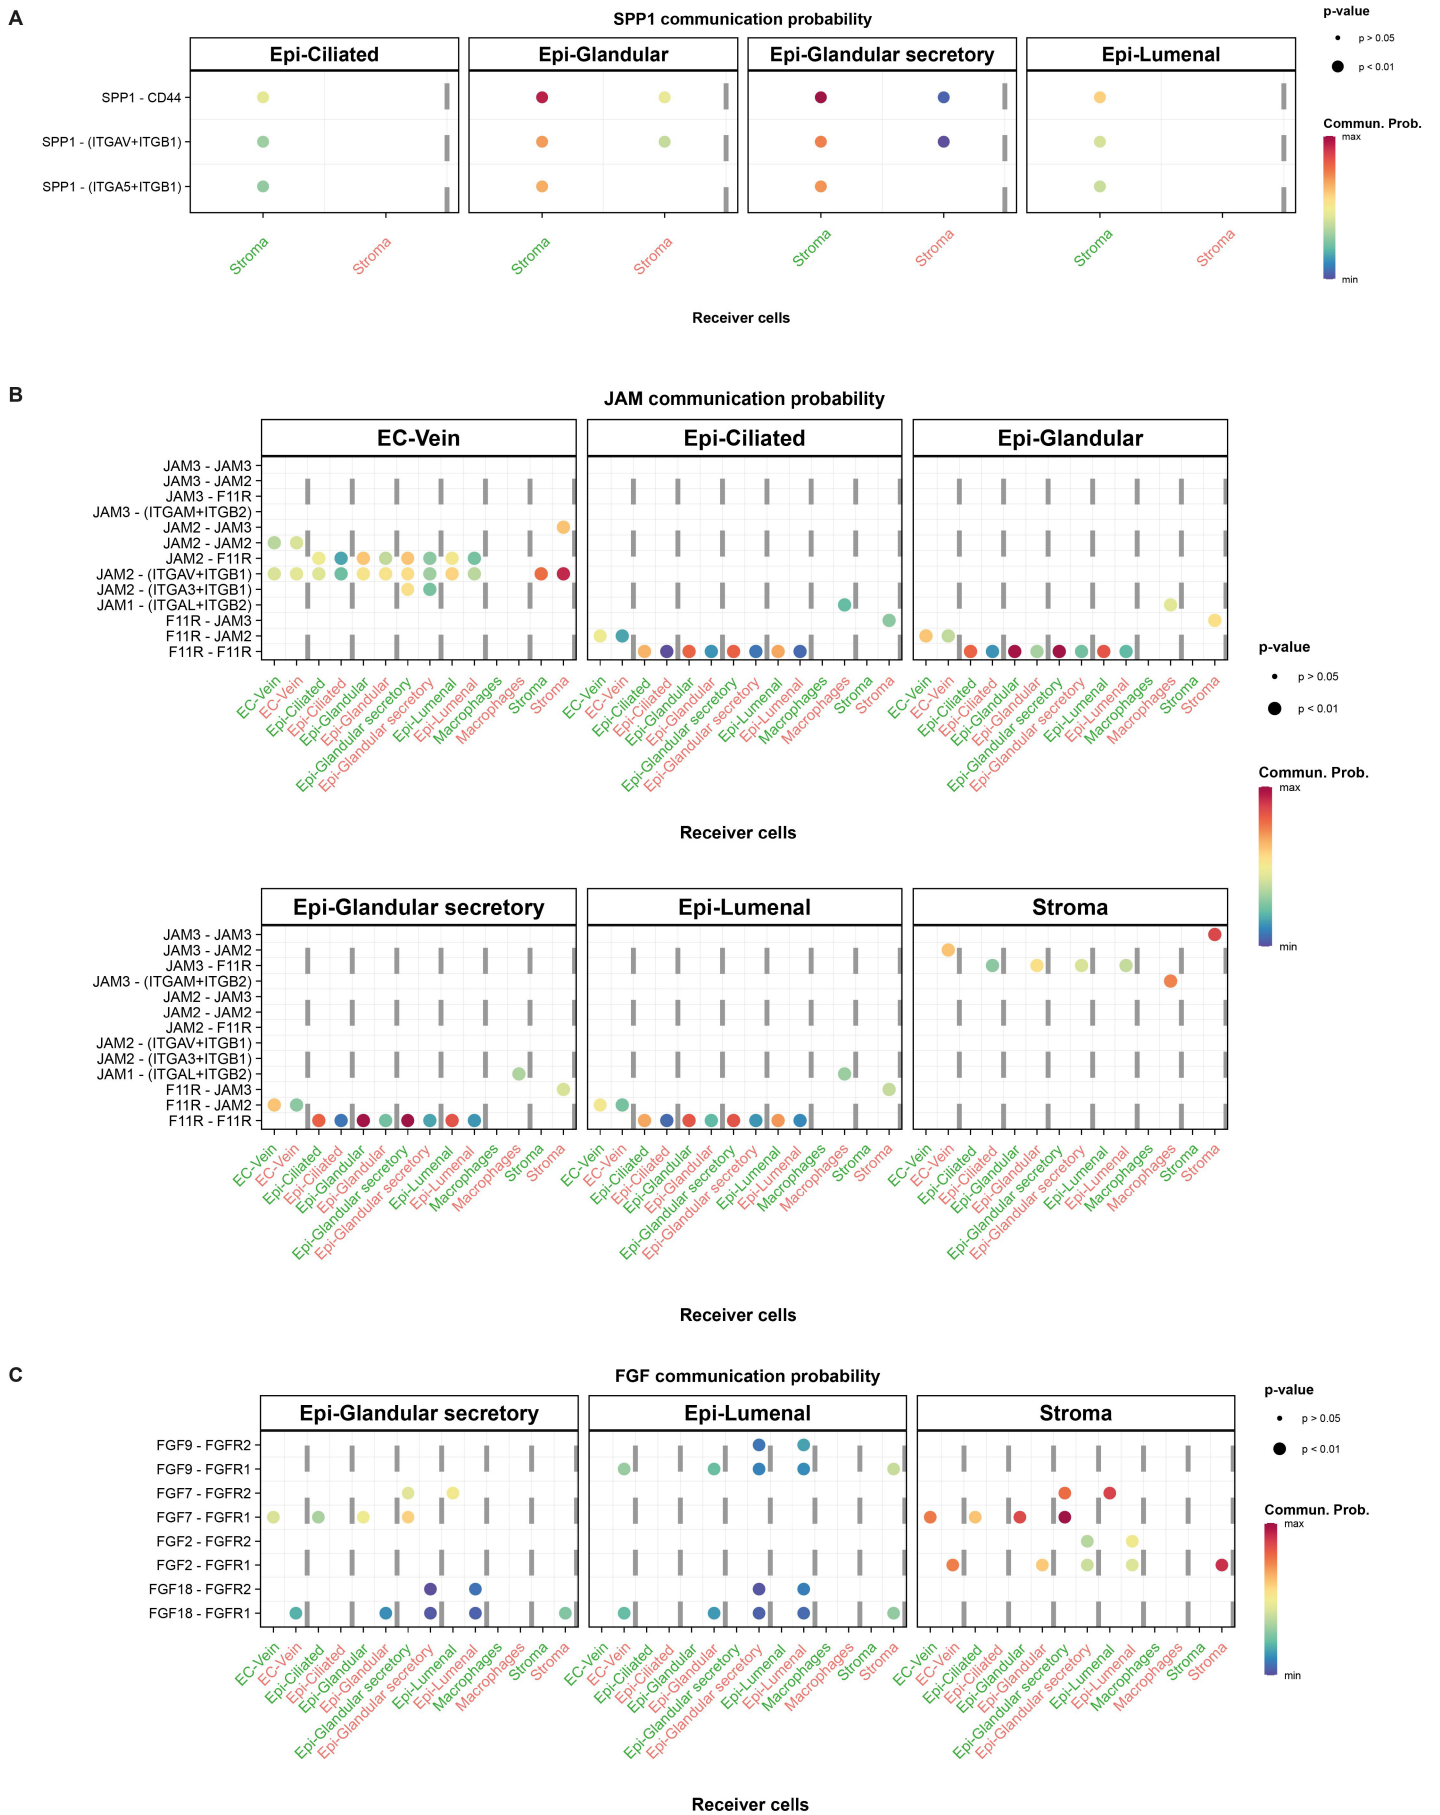

**Supplementary Figure 14.** CCC probabilities in pathways related to stromal decidualization, cell adhesion, and epithelial/stromal homeostasis. Dot plot displaying CCC probabilities of the **A**) SPP1 pathway (two-sided Wilcoxon test), **B**) JAM pathways (two-sided Wilcoxon test), and **C**) FGF pathways (two-sided Wilcoxon test).



**Supplementary Table 1. Organoid's culture medium.**

| <b>Reagent</b>                            | <b>Final concentration</b> | <b>Commercial brand</b>  | <b>Reference</b> |
|-------------------------------------------|----------------------------|--------------------------|------------------|
| DMEM F12 (+Glutamine<br>+HEPES)           | 1X                         | Thermo Fisher Scientific | 31331028         |
| Noggin                                    | 100 ng/ml                  | R&D Systems              | 6057-NG-100      |
| RSPO-1 (R-spondin 1)                      | 200 ng/ml                  | Peptotech                | 120-38           |
| Insulin-Transferrin-Selenium<br>(ITS)     | 1%                         | Life Technologies        | 41400045         |
| Penicillin/streptomycin                   | 1%                         | Life Technologies        | 15140122         |
| N2 supplement                             | 1%                         | Life Technologies        | 17502048         |
| B27 supplement                            | 2%                         | Life Technologies        | 12587010         |
| N-acetyl L-cysteine                       | 1.25 mM                    | Merck                    | A7250-50G        |
| Nicotinamide                              | 1 mM                       | Merck                    | 72340-100G       |
| A83-01                                    | 0.5 $\mu$ M                | Merck                    | SML0788-5MG      |
| p38 inhibitor (SB202190)                  | 10 $\mu$ M                 | Merck                    | S7067            |
| EGF (epidermal growth factor)             | 50 ng/ml                   | R&D Systems              | 236-EG-01M       |
| b-FGF (basic fibroblast growth<br>factor) | 2 ng/ml                    | Thermo Fisher Scientific | PHG0264          |
| FGF10 (fibroblast growth factor<br>10)    | 50 ng/ml                   | Peptotech                | 100-26           |
| Rock Inhibitor (Y-27632)                  | 9 $\mu$ M                  | Merck                    | SCM075           |
