# Supplementary material for: Decoding the endometrial niche of Asherman’s Syndrome at single-cell resolution
Source: PubMed Central journal article supplement (PMC10514053; doi:10.1038/s41467-023-41656-1), 2023-09-21
Supplement: 41467_2023_41656_MOESM2_ESM.pdf [file 41467_2023_41656_MOESM2_ESM.pdf]

## **Description of Additional Supplementary Files**

**Supplementary Data 1.** Metadata and sample QC metrics of study subjects

**Supplementary Data 2.** Canonical gene markers from reference single-cell atlases to distinguish between cell types

**Supplementary Data 3.** Differentially expressed marker genes by cell type. Wilcoxon test two-sided was applied and p values were corrected using FDR

**Supplementary Data 4.** Conserved marker genes between AS and secretory-phase controls. Wilcoxon test two-side was applied and p values were corrected using FDR

**Supplementary Data 5.** Differentially-expressed genes between AS and secretory-phase controls. Wilcoxon test two-sided was applied and p values were corrected using FDR

**Supplementary Data 6.** Differentially-expressed genes between AS and WOI controls. Wilcoxon test two-sided was applied and p values were corrected using FDR

**Supplementary Data 7.** HTML report of differential cell-to-cell communications between AS and WOI controls

**Supplementary Data 8.** Differentially-expressed genes between AS, and control EEOs. Wilcoxon test two-sided was applied and p values were corrected using FDR

**Supplementary Data 9.** Ambient RNA genes detected using CellBender between AS and WOI control conditions

**Supplementary Data 10.** Cell ratios between AS and control conditions

**Supplementary Data 11:** sourcedata\_AS\_vs\_control\_CCC.xlsx: Contains the data related to figures 4 and supplementary figures 8, 9, 10, 11, and 12

**Supplementary Data 12:** sourcedata\_AS\_vs\_WOI\_control\_CCC.xlsx: Contains the data related to figure 5 and supplementary figures 13 and 14
